# Supplementary material for: Genomic Characterization of Imipenem- and Imipenem-Relebactam-Resistant Clinical Isolates of Pseudomonas aeruginosa
Source: mSphere. 2021 Nov 24;6(6):e00836-21. doi: 10.1128/mSphere.00836-21 (PMC8612254; doi:10.1128/mSphere.00836-21)
Supplement: FIG S1 [file msphere.00836-21-sf001.pdf]

Color Key  
and Histogram

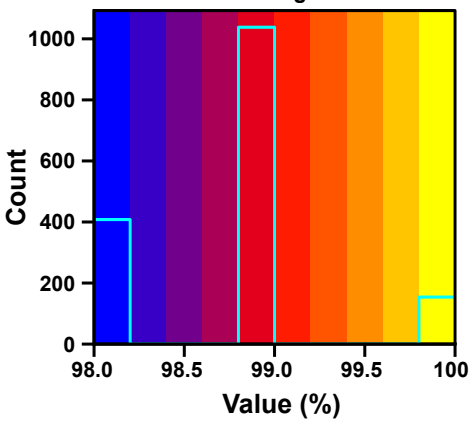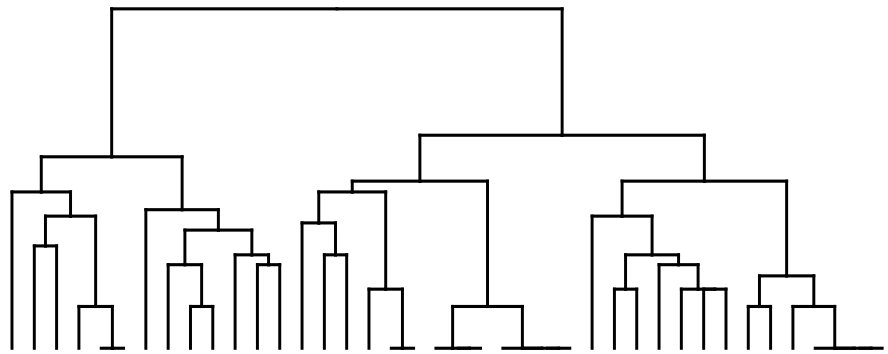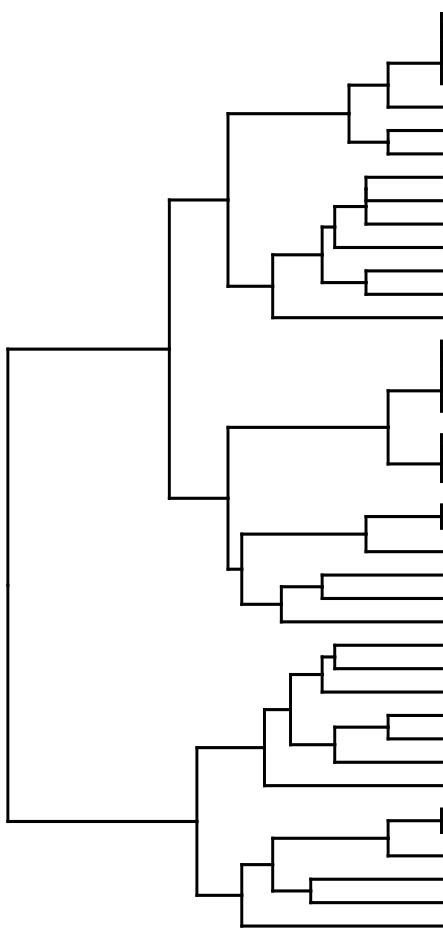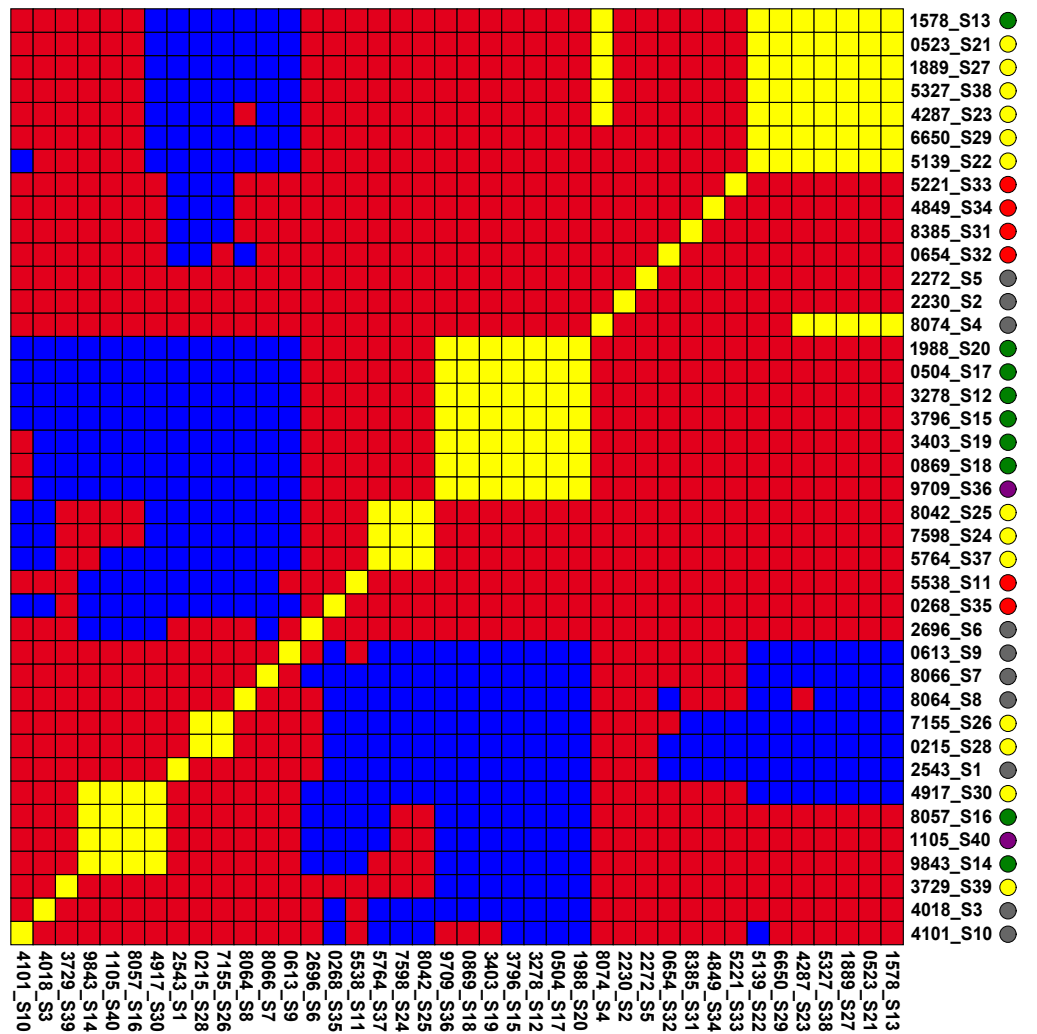

- Group 1. Imipenem RES; I/R RES; NO Carbapenems
- Group 2. Imipenem RES; I/R RES; Carbapenems
- Group 3. Imipenem RES; I/R SEN; NO Carbapenems
- Group 4. Imipenem RES; I/R SEN; Carbapenems
- Group 5. Imipenem SEN; I/R SEN; NO Carbapenems
