# Supplementary material for: Genomic Characterization of Imipenem- and Imipenem-Relebactam-Resistant Clinical Isolates of Pseudomonas aeruginosa
Source: PubMed Central journal article supplement (PMC8612254; doi:10.1128/msphere.00836-21), 2021-11-24

- Group 1. Imipenem RES; I/R RES; NO Carbapenems
- Group 2. Imipenem RES; I/R RES; Carbapenems
- Group 3. Imipenem RES; I/R SEN; NO Carbapenems
- Group 4. Imipenem RES; I/R SEN; Carbapenems
- Group 5. Imipenem SEN; I/R SEN; NO Carbapenems

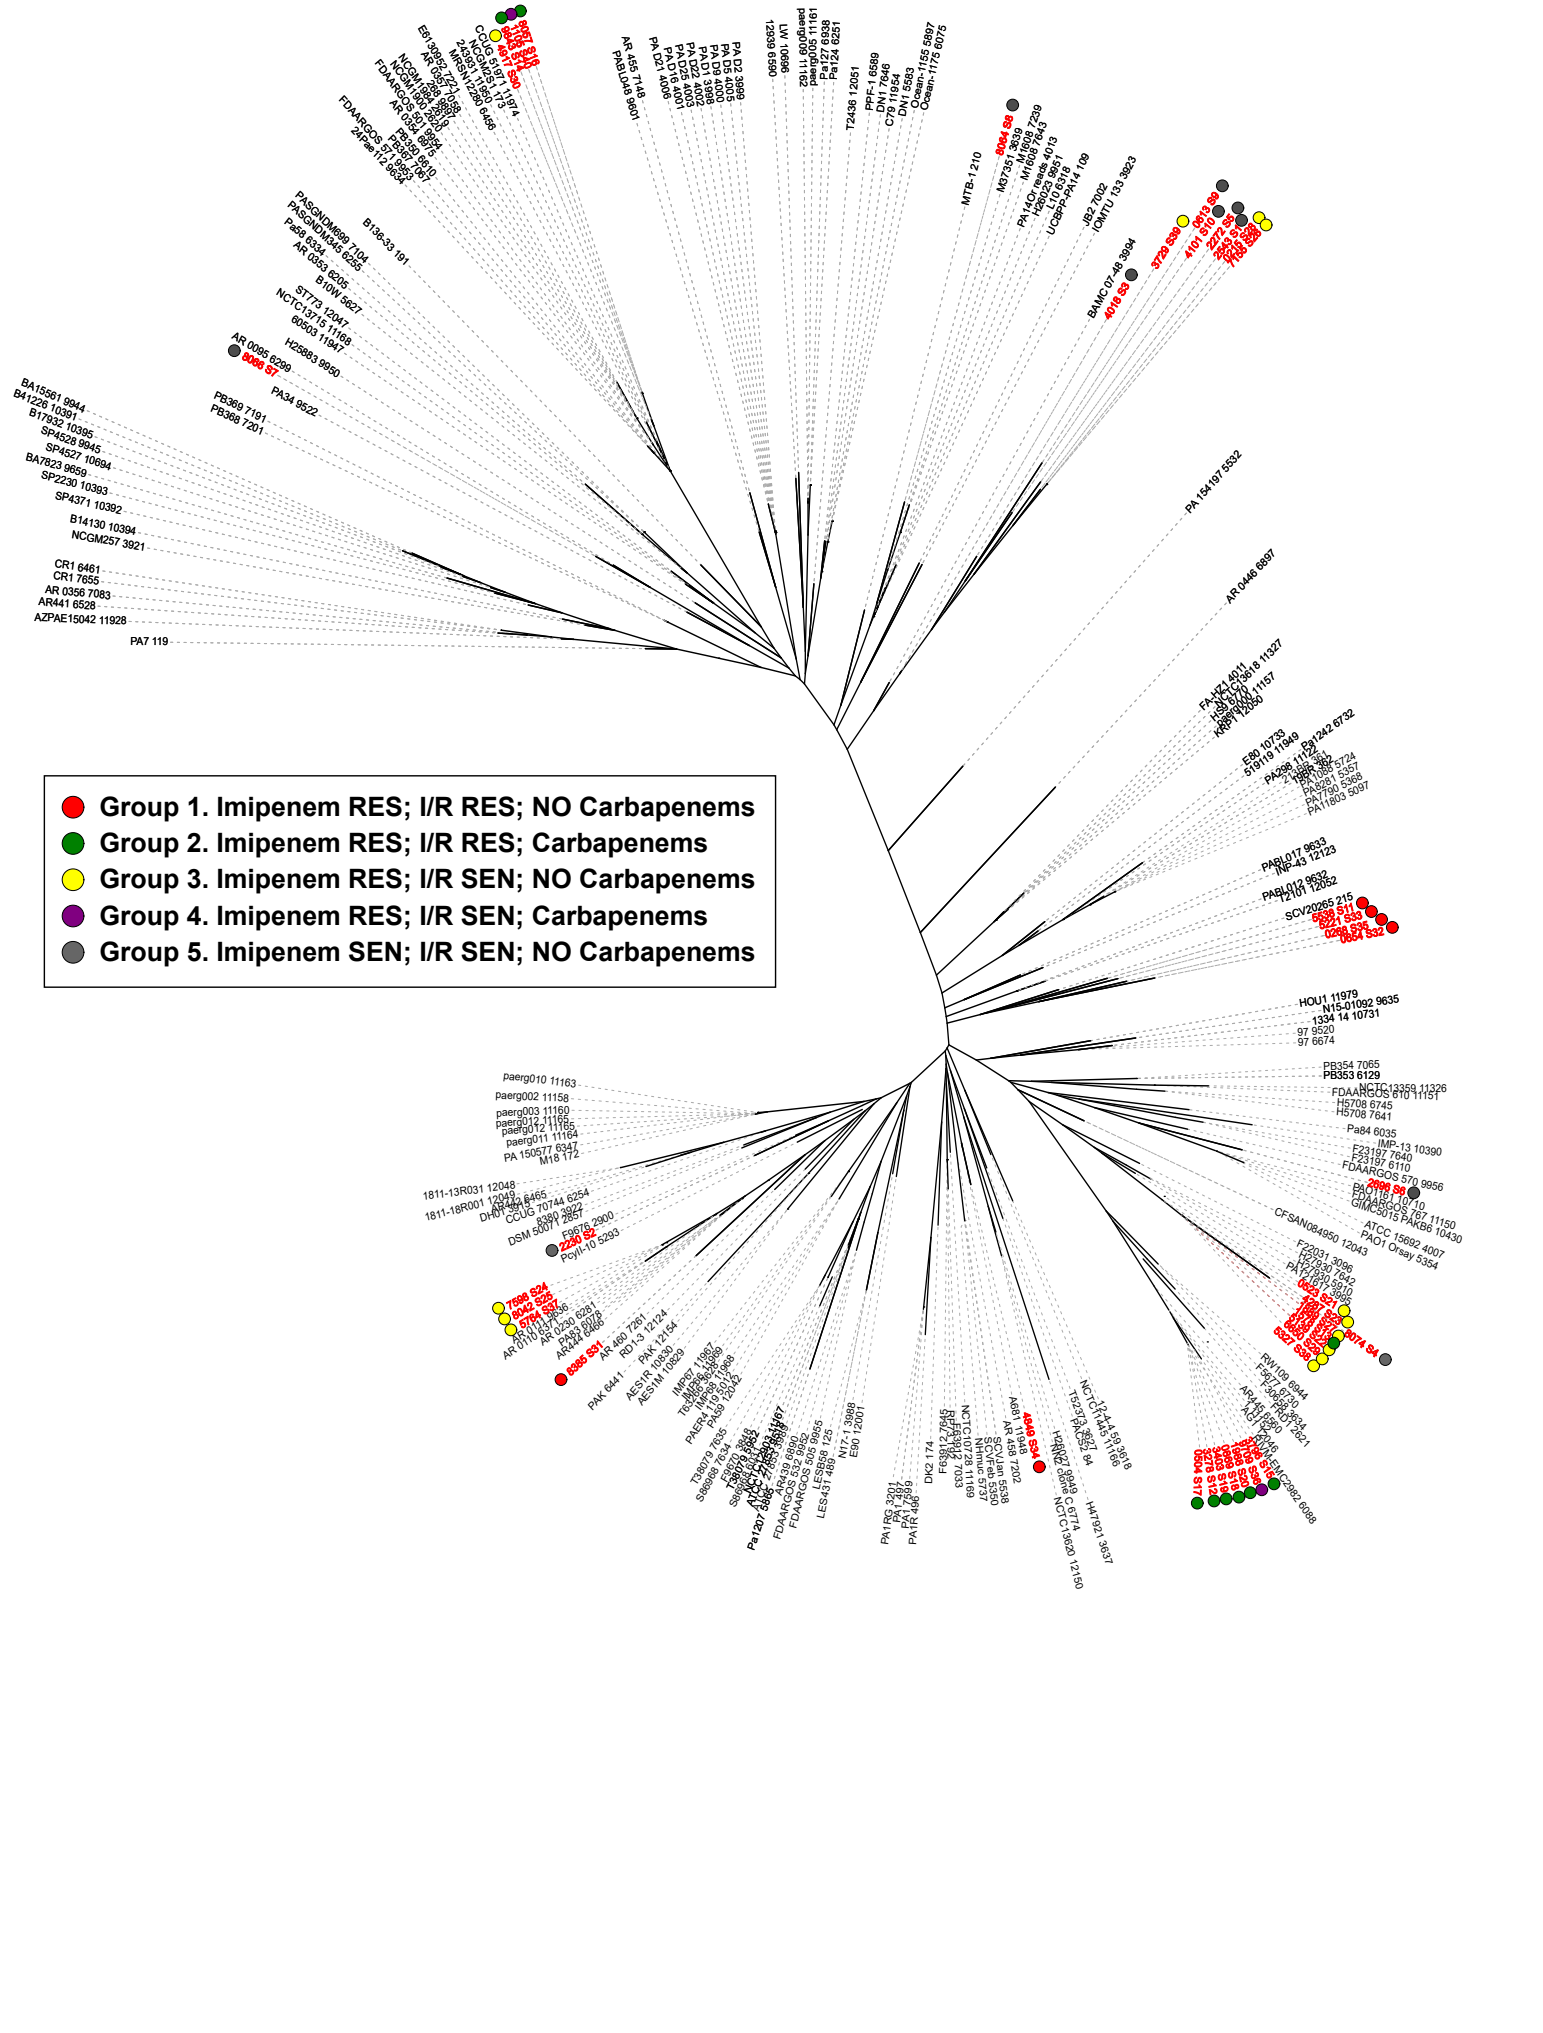

Supplement: msphere.00836-21-sf002.pdf [file msphere.00836-21-sf002.pdf]
