# Supplementary material for: Genomic Characterization of Imipenem- and Imipenem-Relebactam-Resistant Clinical Isolates of Pseudomonas aeruginosa
Source: PubMed Central journal article supplement (PMC8612254; doi:10.1128/msphere.00836-21), 2021-11-24

***Serratia marcescens* (Integron)**

(Order Enterobacterales; Host human; Location Canada)

***Alcaligenes faecalis* MUB14 (ICE)**

(Order Burkholderiales; Host human; Location Poland)

***Citrobacter freundii* MRSN12115 (Plasmid)**

(Order Enterobacterales; Host human; Location USA)

***Pseudomonas aeruginosa* PAcoop101 (Plasmid)**

(Order Pseudomonadales; Host human; Location UK)

***Klebsiella pneumoniae* Kkp4 (Plasmid)**

(Order Enterobacterales; Host human; Location Kuwait)

***Enterobacter hormaechei* AMS-38 (Plasmid)**

(Order Enterobacterales; Host human; Location Japan)

**1578-S13**

(Order Pseudomonadales; Host human; Location Spain)

**Antibiotic Resistance Genes**

|                                                      |                                                         |
|------------------------------------------------------|---------------------------------------------------------|
| metallo-beta-lactamase (VIM-4)                       | dihydropteroate synthase                                |
| aminoglycoside N-acetyltransferase AAC(6')           | streptomycin 3"-adenyltransferase                       |
| dihydrofolate reductase                              | small multidrug resistance (SMR) antibiotic efflux pump |
| quaternary ammonium compound-resistance protein SugE |                                                         |

Is element

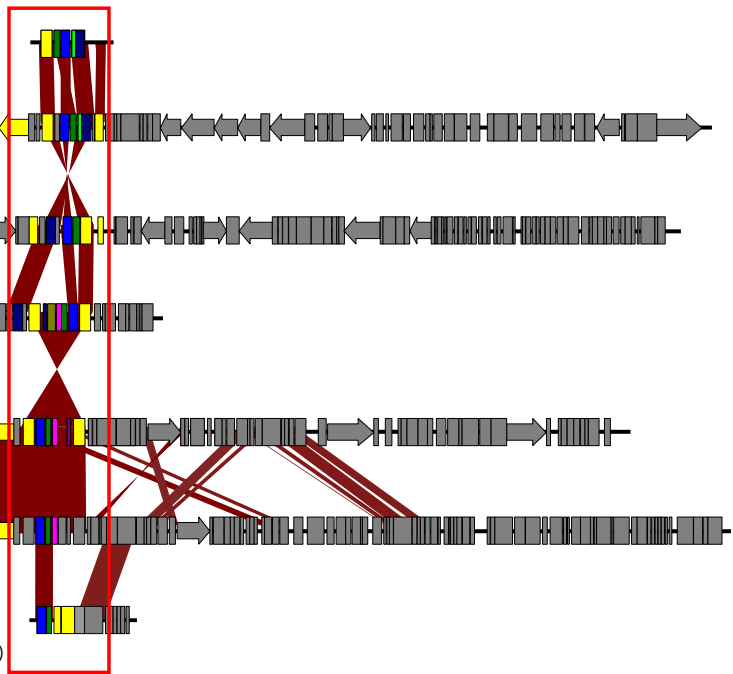

Supplement: msphere.00836-21-sf003.pdf [file msphere.00836-21-sf003.pdf]
