# Supplementary material for: Genomic Characterization of Imipenem- and Imipenem-Relebactam-Resistant Clinical Isolates of Pseudomonas aeruginosa
Source: PubMed Central journal article supplement (PMC8612254; doi:10.1128/msphere.00836-21), 2021-11-24
Supplement: msphere.00836-21-sf004.pdf [file msphere.00836-21-sf004.pdf]

Truncated proteins

-40  
-57  
-59  
-67  
-103  
-115  
-127  
-138  
-169  
-170  
-185  
-186  
-189  
-202  
-210  
-230  
-240  
-250  
-262  
-267  
-276  
-281  
-296  
-301  
-310  
-312  
-315  
-327  
-347  
-403  
-424  
-425

2696-S6 (SEN) DSSQTKVWEFEPVEIESQNATAKQRGAQLSQG  
2230-S2 (SEN) DSSQTKVWEFEPVEIESQNATAKQRGAQLSQG  
2272-S5 (SEN) DERQTKLWEFQGTQAKTQTAAAQEEGGQMAEG  
2543-S1 (SEN) DSSQSTVWE LQGTEIESQNATAKQEGGQLSQA  
8064-S8 (SEN) DSSQSTVWE LQGTEIESQNATAKQEGGQLSQA  
8066-S7 (SEN) DSSQSTVWE LQGTEIESQNATAKQEGGQLSQA  
8074-S4 (SEN) DSSQTKLWEFQGTQAKTQTAAAQERGAQMAEG  
0215-S28 (RES I) DSSQTKLWEFQGTQAKTQTAAGQEEERGQMAEG  
7155-S26 (RES I) DSSQTKLWEFQGTQAKTQTAAGQEEERGQMAEG  
5538-S11 (RES IR) DSSQSTVWELEPVEIESQNATAQQRGAQLSQG  
0523-S21 (RES I) NERQTKVWEFEPVQAKTQTSTGQEGGA\*  
1889-S27 (RES I) NERQTKVWEFEPVQAKTQTSTGQEGGA\*  
5139-S22 (RES I) NERQTKVWEFEPVQAKTQTSTGQEGGA\*  
5327-S38 (RES I) NERQTKVWEFEPVQAKTQTSTGQEGGA\*  
6650-S29 (RES I) NERQTKVWEFEPVQAKTQTSTGQEGGA\*  
4849-S34 (RES IR) NERQTKVWEFEPVQAKTQTSTGQEGGA\*  
5221-S33 (RES IR) NERQTKVWEFEPVQAKTQTSTGQEGGA\*  
8385-S31 (RES IR) DERQTKVWEFEPVQAKTQTSTGQEGGA\*  
0268-S35 (RES IR) NERYTKVWEFEPVQAKT\*  
5764-S37 (RES I) NERQTKVW\*  
7598-S24 (RES I) NERQTKVW\*  
8042-S25 (RES I) NERQTKVW\*  
4287-S23 (RES I) NERQTKV\*\*
